# Supplementary material for: Optimal Obesity- and Lipid-Related Indices for Predicting Metabolic Syndrome in Chronic Kidney Disease Patients with and without Type 2 Diabetes Mellitus in China
Source: MDPI journal article supplement (doi:10.3390/nu14071334), 2022-03-23
Supplement: s1 [file s1]

**Supplementary Table S1.** Predictive value and multivariate logistic regression analysis of seven obesity and lipid-related indices in NCEP-ATPIII criteria

| Variable                | Optimal cut-offs | Youden Index | Sensitivity (%) | Specificity (%) | OR (95% CI)             | P-value |
|-------------------------|------------------|--------------|-----------------|-----------------|-------------------------|---------|
| <b>CKD with T2DM</b>    |                  |              |                 |                 |                         |         |
| <b>(Men)</b>            |                  |              |                 |                 |                         |         |
| BMI                     | 24.4             | 0.3194       | 75.8            | 56.14           | 1.196 (1.075-1.332)     | 0.001   |
| WC                      | 87               | 0.3115       | 60              | 71.15           | 1.089 (1.039-1.141)     | < 0.001 |
| VFA (cm <sup>2</sup> )  | 101              | 0.3524       | 63.01           | 72.22           | 1.014 (1.006-1.023)     | 0.001   |
| SFA (cm <sup>2</sup> )  | 149              | 0.3171       | 83.5            | 48.15           | 1.011 (1.005-1.018)     | 0.001   |
| VAI                     | 1.58             | 0.8439       | 90.51           | 93.88           | 71.795 (14.460-356.467) | < 0.001 |
| CVAI                    | 111.21           | 0.4237       | 62.77           | 79.59           | 1.033 (1.019-1.046)     | < 0.001 |
| LAP                     | 34.84            | 0.5722       | 71.22           | 86              | 1.105 (1.064-1.146)     | < 0.001 |
| <b>CKD with T2DM</b>    |                  |              |                 |                 |                         |         |
| <b>(Women)</b>          |                  |              |                 |                 |                         |         |
| BMI                     | 25               | 0.5556       | 55.56           | 100             | 1.478 (1.013-2.156)     | 0.043   |
| WC                      | 77               | 0.5739       | 85.96           | 71.43           | 1.307 (1.046-1.632)     | 0.018   |
| VFA (cm <sup>2</sup> )  | 86               | 0.7377       | 73.77           | 100             | 1.154 (1.012-1.317)     | 0.033   |
| SFA (cm <sup>2</sup> )  | 200              | 0.5410       | 54.1            | 100             | 1.023 (1.003-1.044)     | 0.026   |
| VAI                     | 1.69             | 0.8396       | 98.25           | 85.71           | 1.749 (1.083-2.824)     | 0.0223  |
| CVAI                    | 97.801           | 0.6992       | 84.21           | 85.71           | 1.169 (1.026-1.333)     | 0.019   |
| LAP                     | 47.12            | 0.7193       | 71.93           | 100             | 1.033 (1.005-1.061)     | 0.0208  |
| <b>CKD without T2DM</b> |                  |              |                 |                 |                         |         |
| <b>(Men)</b>            |                  |              |                 |                 |                         |         |
| BMI                     | 26.9             | 0.3081       | 52.46           | 78.35           | 1.239 (1.101-1.393)     | < 0.001 |
| WC                      | 87               | 0.3502       | 72.13           | 62.89           | 1.101 (1.049-1.155)     | < 0.001 |
| VFA (cm <sup>2</sup> )  | 119              | 0.4210       | 60.66           | 81.44           | 1.026 (1.014-1.038)     | < 0.001 |
| SFA (cm <sup>2</sup> )  | 208              | 0.3914       | 72.13           | 67.01           | 1.017 (1.009-1.025)     | < 0.001 |
| VAI                     | 2.702            | 0.6978       | 85.25           | 84.54           | 4.055 (2.392-6.874)     | < 0.001 |

|                                     |        |        |       |       |                      |         |
|-------------------------------------|--------|--------|-------|-------|----------------------|---------|
| CVAI                                | 112.25 | 0.4205 | 68.85 | 73.2  | 1.031 (1.017-1.044)  | < 0.001 |
| LAP                                 | 39.82  | 0.5638 | 85.25 | 71.13 | 1.058 (1.035-1.082)  | < 0.001 |
| <b>CKD without T2DM<br/>(Women)</b> |        |        |       |       |                      |         |
| BMI                                 | 23     | 0.4157 | 81.25 | 60.32 | 1.378 (1.169-1.624)  | < 0.001 |
| WC                                  | 86     | 0.4673 | 56.25 | 90.48 | 1.123 (1.055-1.195)  | < 0.001 |
| VFA (cm <sup>2</sup> )              | 74     | 0.3070 | 65.62 | 65.08 | 1.023 (1.005-1.042)  | 0.014   |
| SFA (cm <sup>2</sup> )              | 210    | 0.3884 | 53.13 | 85.71 | 1.012 (1.005-1.019)  | 0.001   |
| VAI                                 | 3.11   | 0.6996 | 81.25 | 88.71 | 6.322 (2.665-14.996) | < 0.001 |
| CVAI                                | 90.71  | 0.5393 | 78.12 | 75.81 | 1.076 (1.041-1.112)  | < 0.001 |
| LAP                                 | 44.24  | 0.6850 | 84.37 | 84.13 | 1.160 (1.083-1.243)  | < 0.001 |

Adjusted for age, systolic blood pressure, total cholesterol, LDL, eGFR ; 95% CI, 95% confidence interval; BMI, body mass index; WC, waist circumference; VFA, visceral fat area; SFA, subcutaneous fat area; VAI, visceral adiposity index; CVAI, Chinese visceral adiposity index; LAP, Lipid accumulation product; OR, odds ratio;

**Supplementary Table S2.** Predictive value of seven obesity and lipid-related indices in IDF criteria and multivariate logistic regression analysis

| Variable                         | Optimal cut-offs | Youden Index | Sensitivity (%) | Specificity (%) | OR (95% CI)         | P-value |
|----------------------------------|------------------|--------------|-----------------|-----------------|---------------------|---------|
| <b>CKD with T2DM<br/>(Men)</b>   |                  |              |                 |                 |                     |         |
| BMI                              | 25.9             | 0.6216       | 87.36           | 74.80           | 2.031 (1.646-2.507) | < 0.001 |
| WC                               | 89               | 0.991        | 100             | 99.1            | 2.733 (1.797-4.156) | < 0.001 |
| VFA (cm <sup>2</sup> )           | 123              | 0.6788       | 78.05           | 89.93           | 1.047 (1.032-1.062) | < 0.001 |
| SFA (cm <sup>2</sup> )           | 196              | 0.7234       | 92.68           | 79.66           | 1.064 (1.043-1.085) | < 0.001 |
| VAI                              | 2.62             | 0.34         | 65.43           | 68.57           | 1.160 (0.977-1.377) | 0.091   |
| CVAI                             | 114.94           | 0.8801       | 97.53           | 90.48           | 1.197 (1.119-1.280) | < 0.001 |
| LAP                              | 39.79            | 0.5710       | 83.95           | 73.15           | 1.055 (1.036-1.075) | < 0.001 |
| <b>CKD with T2DM<br/>(Women)</b> |                  |              |                 |                 |                     |         |
| BMI                              | 22.7             | 0.7481       | 92.45           | 82.35           | 2.999 (1.653-5.441) | < 0.001 |

|                         |        |        |       |       |                     |         |
|-------------------------|--------|--------|-------|-------|---------------------|---------|
| WC                      | 79     | 1      | 100   | 100   | 1.206 (1.085-1.340) | < 0.001 |
| VFA (cm <sup>2</sup> )  | 81     | 0.8579 | 92.45 | 93.33 | 1.104 (1.048-1.164) | < 0.001 |
| SFA (cm <sup>2</sup> )  | 143    | 0.8956 | 96.23 | 93.33 | 1.109 (1.034-1.189) | 0.004   |
| VAI                     | 3.25   | 0.5171 | 66    | 85.71 | 1.484 (1.067-2.064) | 0.019   |
| CVAI                    | 97.801 | 0.7057 | 92    | 78.57 | 1.168 (1.059-1.288) | 0.002   |
| LAP                     | 47.12  | 0.7286 | 80    | 92.86 | 1.107 (1.042-1.177) | 0.001   |
| <b>CKD without T2DM</b> |        |        |       |       |                     |         |
| <b>(Men)</b>            |        |        |       |       |                     |         |
| BMI                     | 26     | 0.7062 | 88.89 | 81.73 | 2.146 (1.672-2.756) | < 0.001 |
| WC                      | 89     | 0.9038 | 100   | 90.38 | 1.673 (1.384-2.023) | < 0.001 |
| VFA (cm <sup>2</sup> )  | 114    | 0.7728 | 90.74 | 86.54 | 1.088 (1.057-1.119) | < 0.001 |
| SFA (cm <sup>2</sup> )  | 225    | 0.6884 | 85.19 | 83.65 | 1.048 (1.031-1.066) | < 0.001 |
| VAI                     | 2.74   | 0.5004 | 74.07 | 75.96 | 1.472 (1.199-1.807) | < 0.001 |
| CVAI                    | 113.98 | 0.8853 | 98.15 | 90.38 | 1.211 (1.111-1.320) | < 0.001 |
| LAP                     | 45.6   | 0.7062 | 88.89 | 81.73 | 1.070 (1.046-1.095) | < 0.001 |
| <b>CKD without T2DM</b> |        |        |       |       |                     |         |
| <b>(Women)</b>          |        |        |       |       |                     |         |
| BMI                     | 25.4   | 0.6282 | 76.67 | 86.15 | 1.619 (1.317-1.990) | < 0.001 |
| WC                      | 79     | 0.8462 | 100   | 84.62 | 1.239 (1.123-1.367) | < 0.001 |
| VFA (cm <sup>2</sup> )  | 71     | 0.6077 | 90    | 70.77 | 1.057 (1.030-1.085) | < 0.001 |
| SFA (cm <sup>2</sup> )  | 175    | 0.6538 | 90    | 75.38 | 1.022 (1.012-1.032) | < 0.001 |
| VAI                     | 2.64   | 0.6188 | 90    | 71.87 | 1.758 (1.279-2.415) | < 0.001 |
| CVAI                    | 90.71  | 0.6969 | 90    | 79.69 | 1.108 (1.058-1.160) | < 0.001 |
| LAP                     | 43.52  | 0.7795 | 93.33 | 84.62 | 1.147 (1.081-1.217) | < 0.001 |

Adjusted for age, systolic blood pressure, total cholesterol, LDL, eGFR ; 95% CI, 95% confidence interval; BMI, body mass index; WC, waist circumference; VFA, visceral fat area; SFA, subcutaneous fat area; VAI, visceral adiposity index; CVAI, Chinese visceral adiposity index; LAP, Lipid accumulation product; OR, odds ratio;

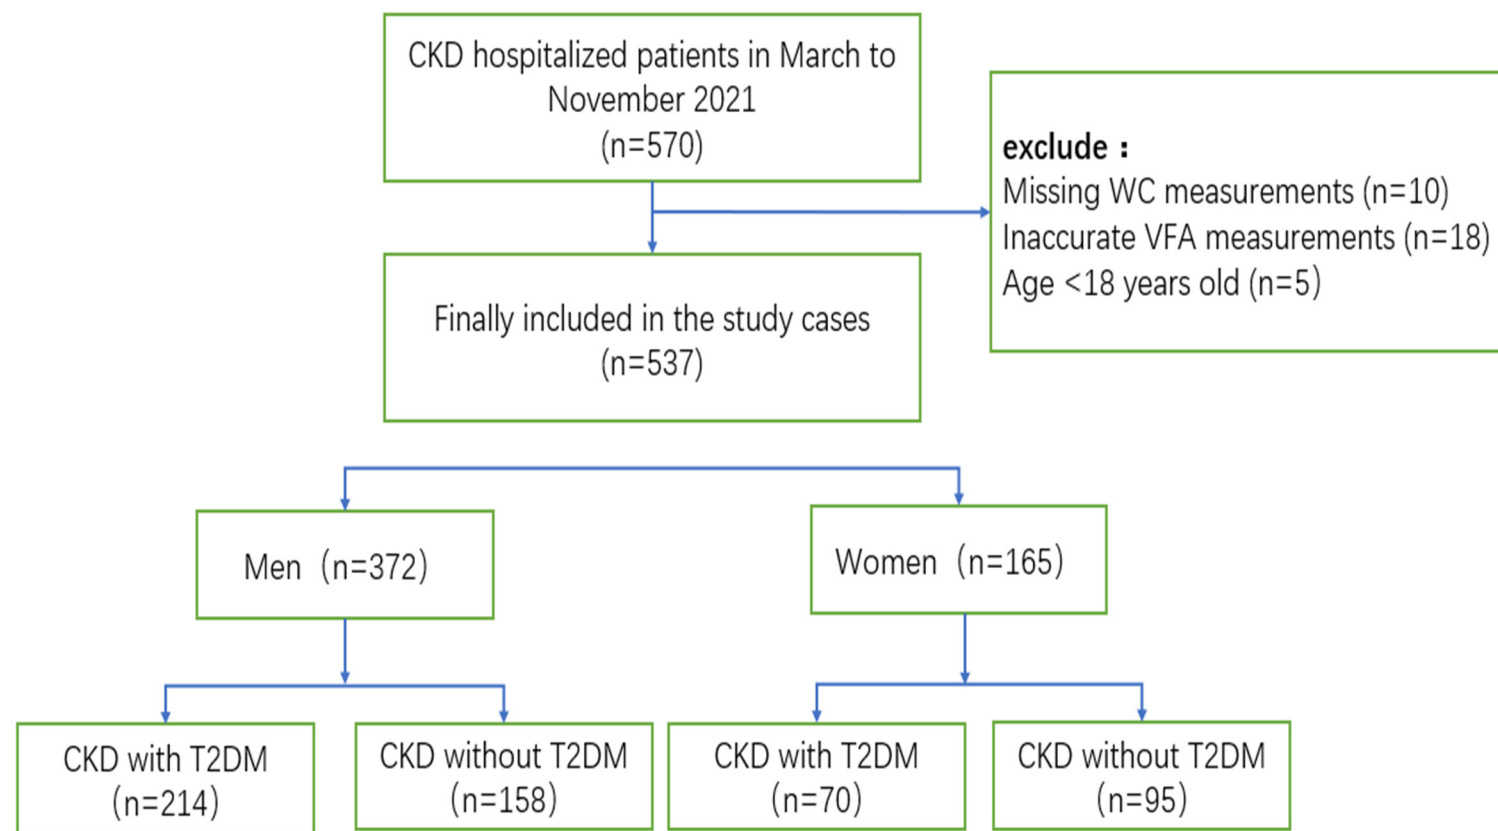

**Supplementary Figure S1.** Flowchart of selection process for the data included in this analysis. WC, waist circumferences; VFA, visceral fat area

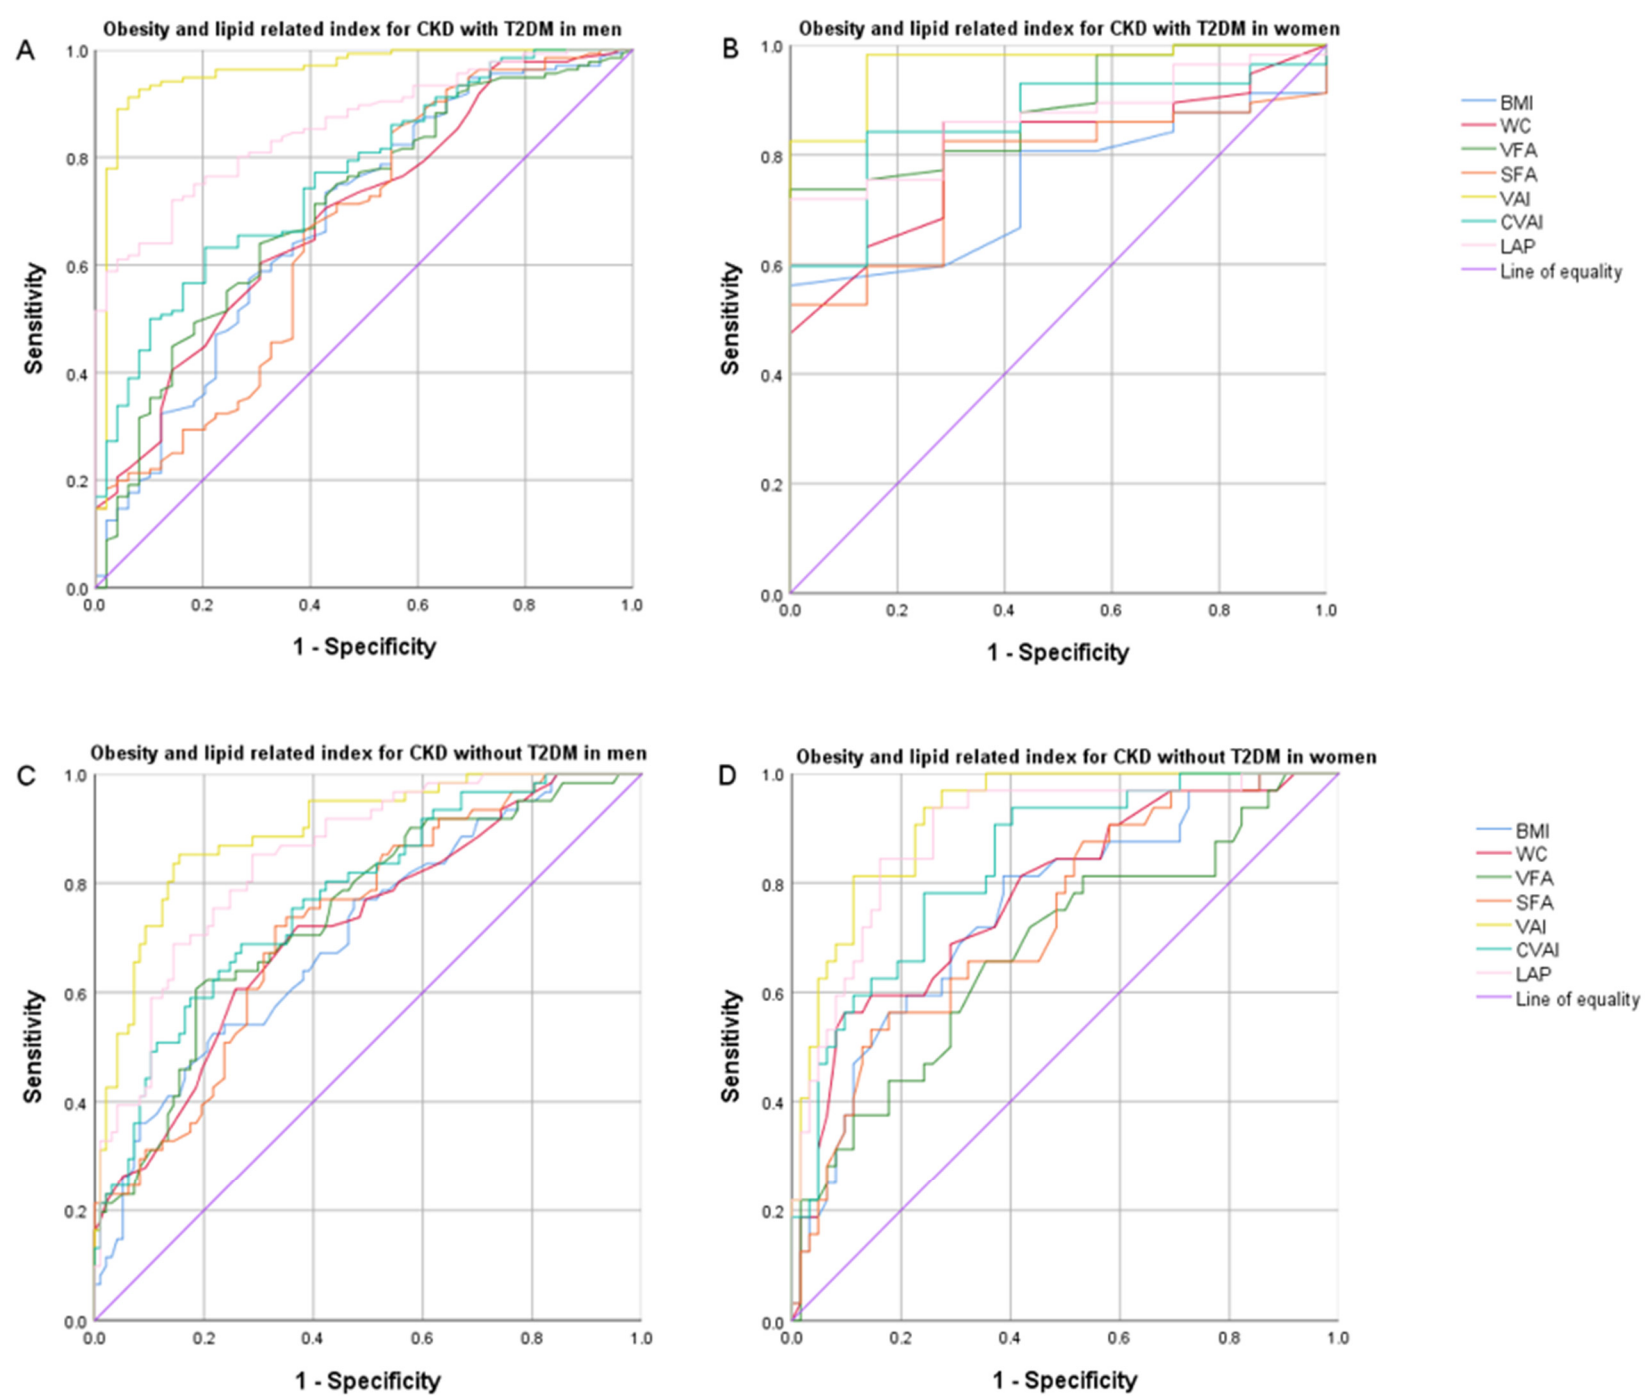

**Supplementary Figure S2.** Comparison of diagnostic value of BMI, WC, VFA, SFA, VAI, CVAI and LAP in predicting metabolic syndrome using NECP-ATP III criteria in CKD males and females with T2DM and without T2DM.

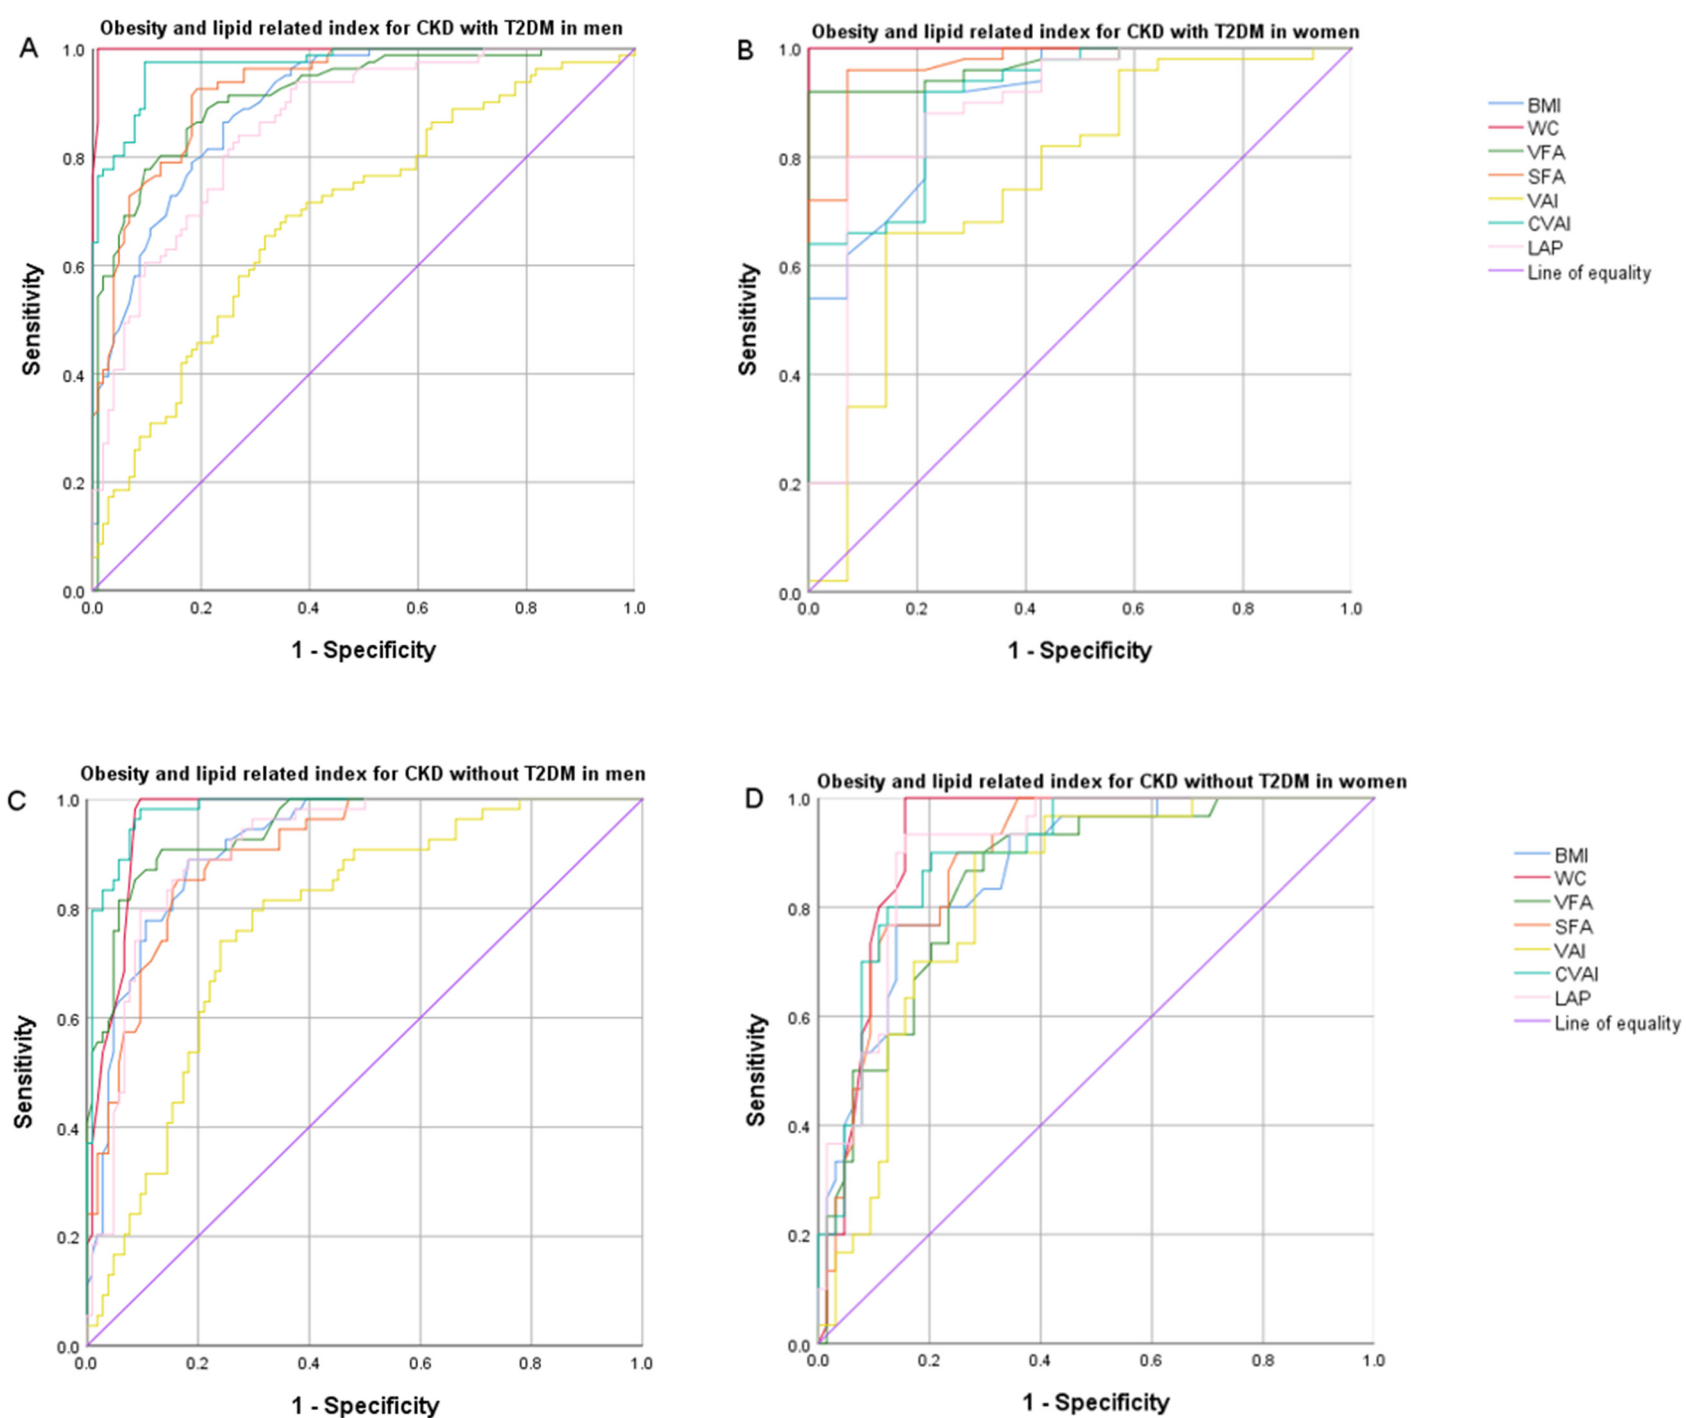

**Supplementary Figure S3.** Comparison of diagnostic value of BMI, WC, VFA, SFA, VAI, CVAI, and LAP in predicting metabolic syndrome using IDF criteria in CKD men and women with T2DM and without T2DM.
